# Supplementary material for: Complementary Feeding and Growth in Infants Born Preterm: A 12 Months Follow-Up Study
Source: MDPI journal article supplement (doi:10.3390/children8121085), 2021-11-24
Supplement: s1 [file s1]

**Table S1.** Practical guidance for weaning between 3 to 12 months of corrected age.

|                                     | <b>Variety and Texture</b>                                                                                                                                    | <b>Frequency</b>                                                            |
|-------------------------------------|---------------------------------------------------------------------------------------------------------------------------------------------------------------|-----------------------------------------------------------------------------|
|                                     | Continue breastfeeding                                                                                                                                        |                                                                             |
| <b>3-9 months of corrected age</b>  | Start with pudding made out of cereal flour (rice, wheat, corn, semolina) or roots (cassava, potatoes) mixed with vegetable broth, add extra virgin olive oil | 2-3 meals per day depending on the child's appetite;                        |
|                                     | Mashed family foods (made out of cereal flour or roots mixed with fish or meat, pulses, vegetables, eggs, cheese); add extra virgin olive oil                 | 1-2 nutritious snacks may be offered: available fruits, yogurt, milk, bread |
|                                     | Continue breastfeeding;                                                                                                                                       |                                                                             |
| <b>9-12 months of corrected age</b> | Mashed family foods (made out of cereal flour or roots mixed with fish or meat, pulses, vegetables, eggs, cheese); add extra virgin olive oil                 | 3-4 meals per day depending on the child's appetite;                        |
|                                     | Chopped foods that babies can pick up and feed themselves                                                                                                     | 1-2 nutritious snacks may be offered: available fruits, yogurt, milk, bread |

**Table S2.** Growth parameters at 52 weeks of postmenstrual age.

|                         | <b>Group 1<br/>(Early Weaning)<br/>(n. 61)</b> | <b>Group 2<br/>(Late Weaning)<br/>(n.93)</b> |
|-------------------------|------------------------------------------------|----------------------------------------------|
| Body weight, grams      | 5880 (5618 to 6142)                            | 5715 (5492 to 5939)                          |
| Body weight Z-Score     | -0.4 (-0.8 to -0.1)                            | -0.4 (-0.7 to -0.1)                          |
| Length, cm              | 59.8 (58.7 to 61.0)                            | 58.5 (57.6 to 61.0)                          |
| Length Z-Score          | -0.4 (-1.0 to 0.1)                             | -0.7 (-1.1 to -0.3)                          |
| Body mass index         | 16 (16 to 17)                                  | 17 (16 to 17)                                |
| Body mass index Z-Score | -0.2 (-0.6 to 0.1)                             | 0.1 (-0.3 to 0.5)                            |
| Ponderal Index          | 28 (26 to 29)                                  | 29 (27 to 31)                                |

Notes. Data were showed as mean (95% confidence interval).

**Table S3** Growth parameters in relation to the presence of morbidity conditions.

|                                      | <b>With morbidity<br/>conditions<br/>(n. 41)</b> | <b>Without morbidity<br/>conditions<br/>(n.113)</b> |
|--------------------------------------|--------------------------------------------------|-----------------------------------------------------|
| <i>52 weeks of postmenstrual age</i> |                                                  |                                                     |
| Body weight, grams                   | 5728 (5422 to 6034)                              | 5799 (5593 to 6004)                                 |
| Body weight Z-Score                  | -0.4 (-0.8 to 0)                                 | -0.4 (-0.7 to -0.1)                                 |
| Length, cm                           | 58.8 (57.5 to 60.0)                              | 59.1 (58.2 to 60.0)                                 |
| Length Z-Score                       | -0.6 to (-1.2 to -0.1)                           | -0.6 (-1.0 to -0.2)                                 |
| Body mass index                      | 17 (16 to 17)                                    | 17 (16 to 17)                                       |
| Body mass index Z-Score              | 0 (-0.5 to 0.4)                                  | 0 (-0.4 to 0.3)                                     |
| Ponderal Index                       | 28 (27 to 30)                                    | 28 (27 to 30)                                       |
| <i>12 months of corrected age</i>    |                                                  |                                                     |
| Body weight, grams                   | 8830 (8435 to 9225)                              | 9005 (8719 to 9291)                                 |
| Body weight Z-Score                  | -0.6 (-0.9 to -0.2)                              | -0.4 (-0.6 to -0.1)                                 |
| Length, cm                           | 73.8 (72.4 to 75.2)                              | 73.8 (73.0 to 74.5)                                 |
| Length Z-Score                       | -0.2 (-0.6 to 0.3)                               | -0.1 (-0.4 to 0.1)                                  |
| Body mass index                      | 16 (16 to 17)                                    | 17 (16 to 17)                                       |
| Body mass index Z-Score              | -0.6 (-1.0 to -0.2)                              | -0.4 (-0.7 to 0)                                    |
| Ponderal Index                       | 22 (21 to 23)                                    | 22 (21 to 23)                                       |

Notes. Data were showed as mean (95 % confidence interval).
